# Supplementary material
Source: publisher site journal article supplement (https://www.dovepress.com/article/271864)

**Supplemental Table 1.** Baseline and 10-years follow-up clinical and lung function characteristics of the smokers without COPD included in the validation study.

| **Variable** | **Baseline** | **10 years follow-up** | **p-value** |
| --- | --- | --- | --- |
| BMI* | 29±5 | 30±5 | 0.343 |
| FEV1 (L)* | 2.64±0.75 | 2.47±0.67 | **0.011** |
| FEV1 (% pred)* | 94±9 | 95±8 | 0.648 |
| FVC (% pred)* | 103±13 | 103±15 | 0.950 |
| FEV1/FVC (% pred)* | 74±4 | 76±11 | 0.556 |
| DLCO * | 92±22 | 88±25 | 0.347 |
| IC/TLC (%)* | 42±7 | 42±7 | 1.000 |
| 6MWD (mts)* | 580±65 | 566±81 | 0.428 |

*Data are presented as mean ±SD. BMI, body mass index; DLCO, diffusion capacity for carbon monoxide; FEV1, forced expiratory volume in one second; FVC, forced vital capacity; IC/TLC, inspiratory capacity to total lung capacity ratio; % pred, per cent predicted; 6MWD, six minutes walking distance test.

**Supplemental Figure 1.** Dysregulated expression of miR-1246 in COPD patients vs. control smokers at baseline.


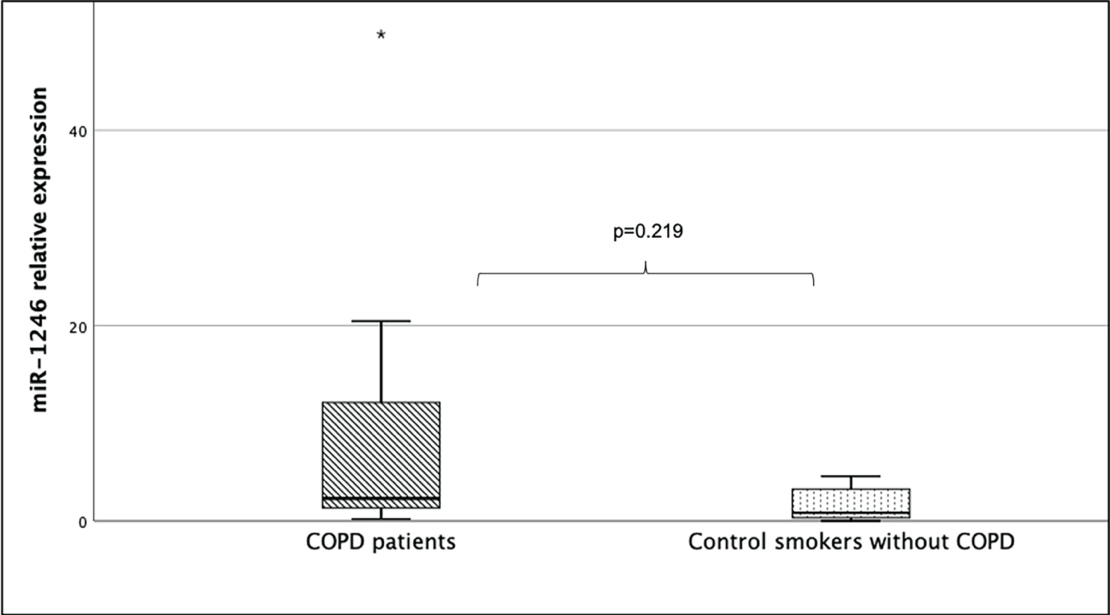

Supplement: Supplementary file 1 [file get_supplementary_file.php]
